# Supplementary material for: Chromatographic data analysis. Part 3.3.4: handling hyphenated data in chromatography
Source: Royal Society of Chemistry journal article supplement (doi:10.1039/c3ay40965a), 2013-12-20
Supplement: c3ay40965a.pdf [file c3ay40965a.pdf]

1\_2 contains the zipped file 1\_2.cdf which is the GC × GC-TOFMS chromatogram of 100% conventional diesel. The tutorial uses this chromatogram for the training set.

2\_1 contains the zipped file 2\_1.cdf which is the GC × GC-TOFMS chromatogram of 100% conventional diesel. The tutorial uses this chromatogram for the training set.

3\_1 contains the zipped file 3\_1.cdf which is the GC × GC-TOFMS chromatogram of a blend of 5% biodiesel with 95% conventional diesel (by volume). The tutorial uses this chromatogram for the training set.

4\_1 contains the zipped file 4\_1.cdf which is the GC × GC-TOFMS chromatogram of a blend of 5% biodiesel with 95% conventional diesel (by volume). The tutorial uses this chromatogram for the training set.

5\_1 contains the zipped file 5\_1.cdf which is the GC × GC-TOFMS chromatogram of a blend of 8.75% biodiesel with 91.25% conventional diesel (by volume). The tutorial uses this chromatogram for the training set.

6\_1 contains the zipped file 6\_1.cdf which is the GC × GC-TOFMS chromatogram of a blend of 8.75% biodiesel with 91.25% conventional diesel (by volume). The tutorial uses this chromatogram for the training set.

7\_1 contains the zipped file 7\_1.cdf which is the GC × GC-TOFMS chromatogram of a blend of 12.5% biodiesel with 87.5% conventional diesel (by volume). The tutorial uses this chromatogram for the training set.

8\_1 contains the zipped file 8\_1.cdf which is the GC × GC-TOFMS chromatogram of a blend of 12.5% biodiesel with 87.5% conventional diesel (by volume). The tutorial uses this chromatogram for the training set.

9\_1 contains the zipped file 9\_1.cdf which is the GC × GC-TOFMS chromatogram of a blend of 12.5% biodiesel with 87.5% conventional diesel (by volume). The tutorial uses this chromatogram for the training set.

11\_1 contains the zipped file 11\_1.cdf which is the GC × GC-TOFMS chromatogram of a blend of 16.25% biodiesel with 83.75% conventional diesel (by volume). The tutorial uses this chromatogram for the training set.

12\_1 contains the zipped file 12\_1.cdf which is the GC × GC-TOFMS chromatogram of a blend of 16.25% biodiesel with 83.75% conventional diesel (by volume). The tutorial uses this chromatogram for the training set.

13\_1 contains the zipped file 13\_1.cdf which is the GC × GC-TOFMS chromatogram of a blend of 20% biodiesel with 80% conventional diesel (by volume). The tutorial uses this chromatogram for the training set. Electronic Supplementary Material (ESI) for Analytical Methods

This journal is © The Royal Society of Chemistry 2014

14\_1 contains the zipped file 14\_1.cdf which is the GC × GC-TOFMS chromatogram of a blend of 20% biodiesel with 80% conventional diesel (by volume). The tutorial uses this chromatogram for the training set.

A\_1 contains the zipped file A\_1.cdf which is the GC × GC-TOFMS chromatogram of a blend of 5% biodiesel with 95% conventional diesel (by volume). The tutorial uses this chromatogram for the test set.

B\_1 contains the zipped file B\_1.cdf which is the GC × GC-TOFMS chromatogram of a blend of 5% biodiesel with 95% conventional diesel (by volume). The tutorial uses this chromatogram for the test set.

C\_1 contains the zipped file C\_1.cdf which is the GC × GC-TOFMS chromatogram of a blend of 8.75% biodiesel with 91.25% conventional diesel (by volume). The tutorial uses this chromatogram for the test set.

D\_1 contains the zipped file D\_1.cdf which is the GC × GC-TOFMS chromatogram of a blend of 8.75% biodiesel with 91.25% conventional diesel (by volume). The tutorial uses this chromatogram for the test set.

E\_1 contains the zipped file E\_1.cdf which is the GC × GC-TOFMS chromatogram of a blend of 12.5% biodiesel with 87.5% conventional diesel (by volume). The tutorial uses this chromatogram for the test set.

F\_1 contains the zipped file F\_1.cdf which is the GC × GC-TOFMS chromatogram of a blend of 12.5% biodiesel with 87.5% conventional diesel (by volume). The tutorial uses this chromatogram for the test set.

H\_1 contains the zipped file H\_1.cdf which is the GC × GC-TOFMS chromatogram of a blend of 16.25% biodiesel with 83.75% conventional diesel (by volume). The tutorial uses this chromatogram for the test set.

I\_1 contains the zipped file I\_1.cdf which is the GC × GC-TOFMS chromatogram of a blend of 20% biodiesel with 80% conventional diesel (by volume). The tutorial uses this chromatogram for the test set.

J\_1 contains the zipped file J\_1.cdf which is the GC × GC-TOFMS chromatogram of a blend of 20% biodiesel with 80% conventional diesel (by volume). The tutorial uses this chromatogram for the test set.
